# Supplementary material for: A novel cell membrane-targeting fluorescent probe for imaging endogenous/exogenous formaldehyde in live cells and zebrafish
Source: Royal Society of Chemistry journal article supplement (doi:10.1039/d1an01669e), 2021-01-01
Supplement: d1an01669e1.pdf [file d1an01669e1.pdf]

## Supporting Information

### **A novel cell membrane-targeting fluorescent probe for imaging endogenous/exogenous formaldehyde in live cells and zebrafish**

Wenlong Sheng <sup>a, c, d</sup>, Xue Zhang <sup>b</sup>, Miaohui Yu <sup>a, c, d</sup>, Meng Jin <sup>a, c, d</sup>, Ning Li <sup>a, c, d</sup>,  
Chen Sun <sup>a, c, d</sup>, Lizhen Wang <sup>a, c, d</sup>, Qing Xia <sup>a, c, d</sup>, Xiaobin Li <sup>a, c, d</sup>, Yun Zhang <sup>a, c, d</sup>,  
Baocun Zhu <sup>b\*\*</sup>, Kechun Liu <sup>a, c, d\*</sup>

<sup>a</sup> Biology Institute, Qilu University of Technology (Shandong Academy of Sciences),  
Jinan 250103, China.

<sup>b</sup> School of Water Conservancy and Environment, University of Jinan, Jinan 250022,  
China.

<sup>c</sup> Engineering Research Center of Zebrafish Models for Human Diseases and Drug  
Screening of Shandong Province, Jinan, China

<sup>d</sup> Shandong Provincial Engineering Laboratory for Biological Testing Technology,  
Jinan, China

\*Corresponding author.

\*\*Corresponding author.

*E-mail address:* liukechun2000@163.com (Kechun Liu), lcyzbc@163.com (Baocun  
Zhu)

## Table of Contents

1. Materials and instruments
2. Determination of the detection limit
3. Additional table of comparison between reported FA probes and **Mem-FA**
4. Determination of quantum yield
5. Cytotoxicity assays
6. Cell imaging experiments
7. Behavioral analysis of zebrafish
8. Zebrafish imaging experiments
9. Colocalization experiments
10. Preparation of reactive oxygen species (ROS) and reactive nitrogen species (RNS)
11. Proofs for detection mechanism of probe **Mem-FA** for formaldehyde

## 1. Materials and instruments

Unless otherwise stated, chemical reagents were purchased from commercial vendor and were used as received. Absorption spectra were carried out using a UV-3101PC spectrophotometer. Fluorescence emission spectra were performed using a Horiba FluoroMax-4 spectrophotometer. The slit width was 2.0 nm for both excitation and emission. High resolution mass spectra (HRMS) were carried out using a LC-MS2010A instrument. Fluorescence imaging of formaldehyde in live cells and zebrafish were carried out on an Olympus FV1000-IX81 confocal fluorescence microscope.

## 2. Determination of the detection limit

The detection limit was calculated based on the fluorescence titration. The detection limit (LOD) was calculated as follows:

$$DL = 3\sigma/k,$$
$$\sigma = \sqrt{\frac{\sum (\bar{x} - x_i)^2}{n - 1}}$$

where  $\sigma$  is the standard deviation of the blank solution,  $\bar{x}$  is the mean of the blank measures,  $x_i$  is the value of blank measures,  $n$  is the number of tested blank measures ( $n = 5$ ), and  $k$  is the slope between the fluorescence intensities versus the concentrations of formaldehyde.

## 3. Additional table of comparison between reported FA probes and Mem-FA

**Table S1.** Comparison of organelle-targeted fluorescent probes for FA

| Probe                                                                               | $\lambda_{em}$ | Detection limit | Response time | Imaging                                                 | references                              |
|-------------------------------------------------------------------------------------|----------------|-----------------|---------------|---------------------------------------------------------|-----------------------------------------|
| 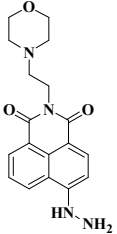   | 543 nm         | 5.02 $\mu$ M    | within 30 min | lysosome-targeted living cells                          | Anal. Chem. 88 (2016) 9359-9363         |
|    | 506/566 nm     | 3 $\mu$ M       | ---           | lysosome-targeted living cells and rat's abdomen tissue | Chem. Commun. 53 (2017) 6520-6523       |
|   | 539 nm         | 4.9 $\mu$ M     | 40 min        | mitochondrial - targeted living cells and liver slides  | New J. Chem. 42 (2018) 8325-8329        |
|  | 470 nm         | ---             | ---           | lysosome-targeted living cells                          | Chem. Commun. 55 (2019) 7053-7056       |
|  | 543 nm         | ---             | within 50 min | endoplasmic reticulum-targeted living cells             | Methods Appl. Fluoresc. 5 (2017) 024005 |

|                                                                                    |        |         |               |                                                       |                                                                                       |
|------------------------------------------------------------------------------------|--------|---------|---------------|-------------------------------------------------------|---------------------------------------------------------------------------------------|
| 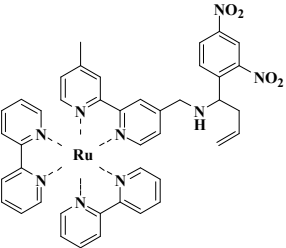  | 644 nm | 19.8 nM | 120 min       | lysosome-targeted living cells, mice and rat's organs | J. Am. Chem. Soc. 141 (2019) 8462-8472                                                |
|   | 550 nm | 12.4 μM | within 20 min | mitochondrial - targeted living cells                 | Analyst 144 (2019) 2297-2303                                                          |
|   | 444 nm | 0.27 μM | 60 min        | lysosome-targeted living cells                        | Spectrochimica Acta Part A: Molecular and Biomolecular Spectroscopy 245 (2021) 118949 |
|  | 520 nm | 214 nM  | 30 min        | membrane-targeted living cells and zebrafish          | This work                                                                             |

**Table S2.** Comparison of naphthalimide-based fluorescent probes for FA

| Probe                                                                               | $\lambda_{em}$ | Detection limit | Response time | Imaging                                        | references                                |
|-------------------------------------------------------------------------------------|----------------|-----------------|---------------|------------------------------------------------|-------------------------------------------|
| 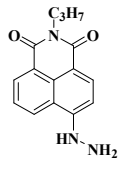 | 543 nm         | 0.71 μM         | within 30 min | endogenous FA in living cells and liver slides | Angew. Chem. Int. Ed. 55 (2016) 3356-3359 |
|  | 553 nm         | 0.76 μM         | within 90 min | FA in leather products                         | Dyes and Pigments 188 (2021) 109175       |

|                                                                                   |        |              |               |                                                                                                                           |                                          |
|-----------------------------------------------------------------------------------|--------|--------------|---------------|---------------------------------------------------------------------------------------------------------------------------|------------------------------------------|
| 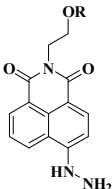 | 541 nm | 0.78 $\mu$ M | 8 min         | exogenous and endogenous FA in living cells and tumour tissue slices                                                      | Chem. Commun. 52 (2016) 11247-11250      |
|  | 541 nm | 1.2 $\mu$ M  | within 80 min | exogenous and endogenous FA in living cells                                                                               | Sensor Actuat. B-Chem. 332 (2021) 129494 |
|  | 520 nm | 214 nM       | 30 min        | distinguishing exogenous and endogenous FA in living cells, FA produced by one-carbon cycle in living cells and zebrafish | This work                                |

#### 4. Determination of quantum yield

Fluorescence quantum yields of probe **Mem-FA** and reaction solution were determined in a mixture aqueous solution of cetyltrimethylammonium bromide (CTAB, 5 mM) and PBS (10 mM, pH 7.4, 10% DMSO) with optically matching solutions of fluorescein ( $\Phi = 0.95$  in 0.1 M NaOH solution)<sup>1</sup> as the standard and the quantum yield was calculated using the following equation:

$$\Phi_s = \Phi_r (A_r F_s / A_s F_r) (n_s^2 / n_r^2)^2$$

Where, s and r denote sample and reference, respectively.  $A$  is the absorbance.  $F$  is the relative integrated fluorescence intensity and  $n$  is the refractive index of the solvent.

Quantum yield of probe **Mem-FA**:  $\Phi = 0.035$

Quantum yield of reaction solution:  $\Phi = 0.124$

#### 5. Cytotoxicity assays

The cell viability of HeLa cells, treated with probe **Mem-FA**, was assessed by a cell counting kit-8 (CCK-8; Dojindo Molecular Technologies, Tokyo, Japan). Briefly, HeLa cells, seeded at a density of  $1 \times 10^6$  cells·mL<sup>-1</sup> on a 96-well plate, were maintained at 37 °C in a 5% CO<sub>2</sub> / 95% air incubator for 12 h. then, the cells were treated with increasing amounts of **Mem-FA** (0, 5, 10, 20 and 30 μM) for 24 h. Subsequently, CCK-8 solution was added into each well for 2 h, and absorbance at 420 nm was measured.

## 6. Cell imaging experiments

The HeLa cells were cultured in Dulbecco's modified Eagle's medium (DMEM) and incubated under an atmosphere containing 5% CO<sub>2</sub> at 37 °C humidified air for 24 h. DMEM contains 10% fetal bovine serum and 1% penicillin-streptomycin.

Firstly, control cells were imaged. Then, prior to imaging, HeLa cells were treated with probe **Mem-FA** (10 μM) for 30 min. The other groups of cells were incubated with **Mem-FA** (10 μM) for 30 min, washed with culture water, and then treated with FA (400 μM) for 30 min for imaging. Next, in order to confirm that probe **Mem-FA** can detect basal FA, another cells were incubated with NaHSO<sub>3</sub> (200 μM) for 30 min, washed with culture water, and then treated with probe **Mem-FA** (10 μM) for 30 min. The other groups of cells were pretreated with Tet (400 μM), and then treated with probe **Mem-FA** (10 μM) for 30 min. Finally, the fluorescence imaging of cells was carried out by confocal fluorescence microscope.

## 7. Behavioral analysis of zebrafish

All animal procedures were performed in accordance with the Guidelines for Care and Use of Laboratory Animals of Qilu University of Technology and approved by the Animal Ethics Committee of Qilu University of Technology.

Behavioral test was conducted to evaluate the safety of **Mem-FA**. The normal zebrafish larvae at 96 hpf were randomly divided into five well plates and exposed to various concentrations of **Mem-FA** (0, 5, 10, 20, 30  $\mu$ M) dissolved in the bathing medium. The larvae were transferred and maintained in a 14 h light (~1000 lux): 10 h dark (LD) cycle at 28 °C with changing fresh **Mem-FA** daily. Then the zebrafish larvae were cleaned in bathing medium and placed in 48-well plates (one larva per well) at 144 hpf. After a 30 min acclimation period, the locomotor activity of each larva was monitored for 20 min in a silent room using an automated computerized video-tracking system (Viewpoint, Lyon, France), and the detailed track was recorded with Zebralab software (Viewpoint). The swimming duration and movement distance were analyzed. A total of twenty-four zebrafish larvae (n=24) were used for each group. Additionally, to reduce possible diurnal factors on level of locomotor activity, all behavioral tests were performed at zeitgeber time 6-8 (ZT6-8). Care and handling of zebrafish assuredly adhered to the Institutional Animal Care and Use Committees of Qilu University of Technology.

## **8. zebrafish imaging experiments**

Healthy male and female zebrafish (AB stain) were maintained in different tanks with a 14 h light / 10 h dark cycle at 28 °C. Then, sexually mature zebrafish were selected to induce spawning in tanks and the zebrafish eggs were obtained by giving



light stimulation in the morning. After sterilizing and cleaning, the fertilized eggs were added to zebrafish embryo culture water (5 mM NaCl, 0.17 mM KCl, 0.4 mM CaCl<sub>2</sub>, 0.16 mM MgSO<sub>4</sub>) and cultured in illumination incubator at 28 °C.

Firstly, control 4-day-old zebrafish were imaged. Then, probe **Mem-FA** (10 μM) was used to incubate zebrafish for 30 min for imaging. The other groups of zebrafish were incubated with probe **Mem-FA** (10 μM) for 30 min, washed with culture water, and then treated with FA (400 μM) for 30 min for imaging. Next, in order to confirm that probe **Mem-FA** can detect basal FA, another group zebrafish were incubated with NaHSO<sub>3</sub> (200 μM) for 30 min, washed with culture water, and then treated with probe **Mem-FA** (10 μM) for 30 min. The other groups of zebrafish were pretreated with Tet (400 μM), and then treated with probe **Mem-FA** (10 μM) for 30 min. Finally, the fluorescence imaging of zebrafish was carried out by confocal fluorescence microscope.

## 9. colocalization experiments

In the membrane localization experiment chemical reagent for targeting membrane was obtained from commercial suppliers. DiD Perchlorate was used as a commercial membrane targeting dye ( $\lambda_{\text{ex}} = 633 \text{ nm}$ ;  $\lambda_{\text{em}} = 650\text{-}750 \text{ nm}$ ).

For distinguishing endogenous and exogenous FA, HeLa cells were divided into two groups. One group of cells was treated with probe **Mem-FA** (10 μM) for 10 min, and then treated with FA (400 μM) for 30 min. The other group was preincubated with Tet (400 μM) for 2 h, and then treated with probe **Mem-FA** (10 μM) for 30 min.

Finally, the fluorescence imaging of cells was carried out by confocal fluorescence microscope.

## **10. Preparation of reactive oxygen species (ROS) and reactive nitrogen species (RNS)**

### **$^1\text{O}_2$**

Singlet oxygen ( $^1\text{O}_2$ ) was generated from HOCl and  $\text{H}_2\text{O}_2$ .

### **$\text{H}_2\text{O}_2$**

The concentration of hydrogen peroxide ( $\text{H}_2\text{O}_2$ ) was determined from the absorption at 240 nm ( $\epsilon = 43.6 \text{ M}^{-1} \text{ cm}^{-1}$ ).

### **NaOCl**

The concentration of sodium hypochlorite (NaOCl) was determined from the absorbance at 292 nm ( $\epsilon = 350 \text{ M}^{-1} \text{ cm}^{-1}$ ).

### **$\text{ONOO}^-$**

Simultaneously, 0.6 M  $\text{KNO}_2$ , 0.6 M HCl and 0.7 M  $\text{H}_2\text{O}_2$  was added to a 3 M NaOH solution at 0 °C. The concentration of peroxynitrite was estimated by using the extinction co-efficient of  $1670 \text{ cm}^{-1} \text{ M}^{-1}$  at 302 nm in 0.1 M sodium hydroxide aqueous solutions.

## **11. HRMS proof for detection mechanism of probe Mem-FA for FA**

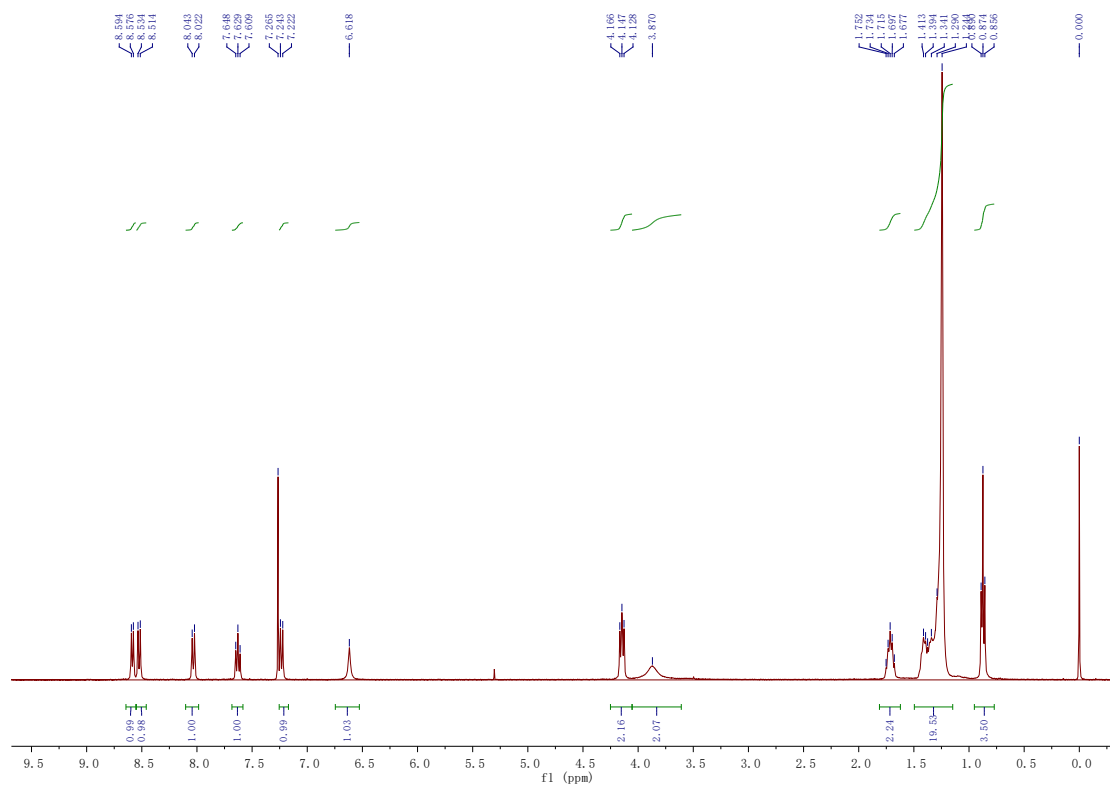

**Fig. S1**  $^1\text{H}$ -NMR data of probe Mem-FA

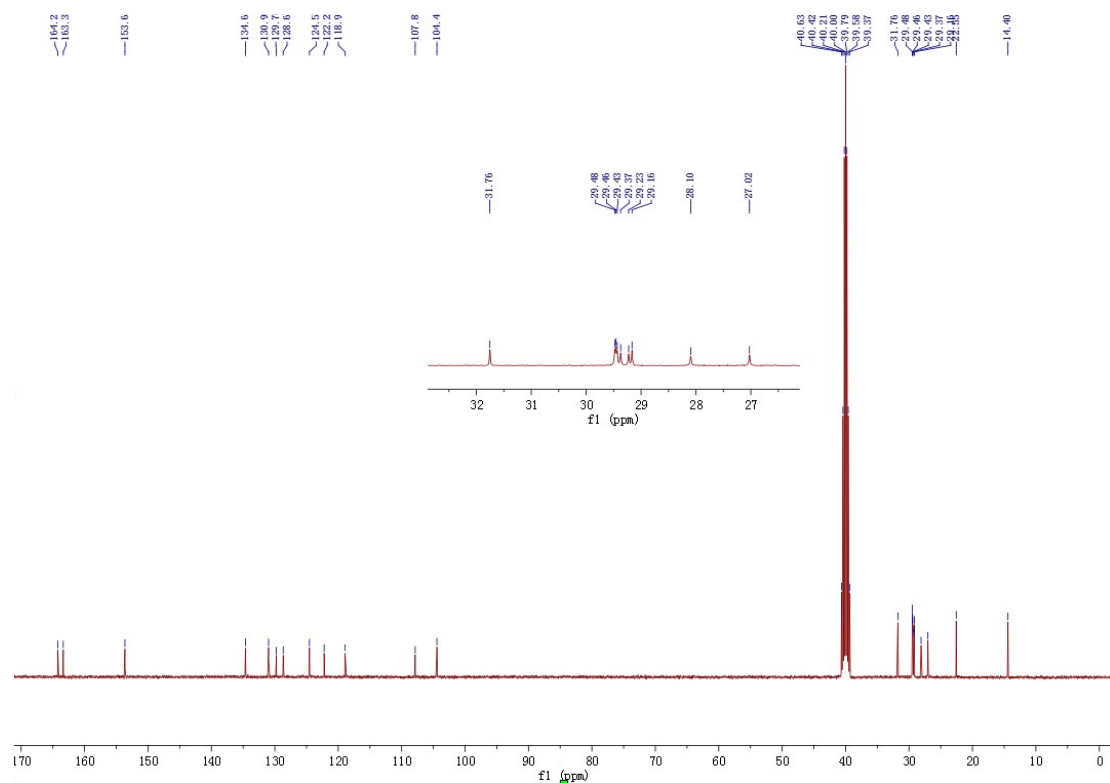

**Fig. S2**  $^{13}\text{C}$ -NMR data of probe Mem-FA

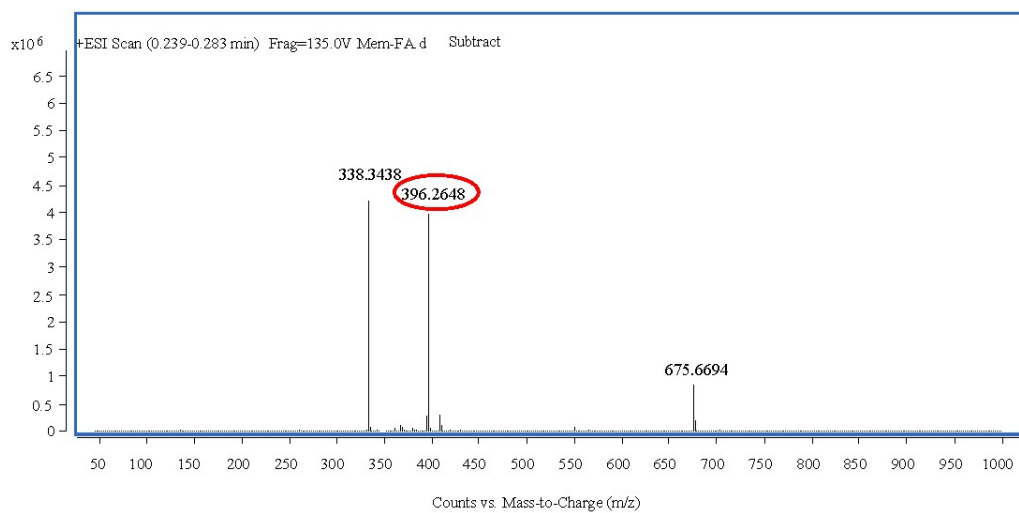

**Fig. S3** HRMS data of probe **Mem-FA**

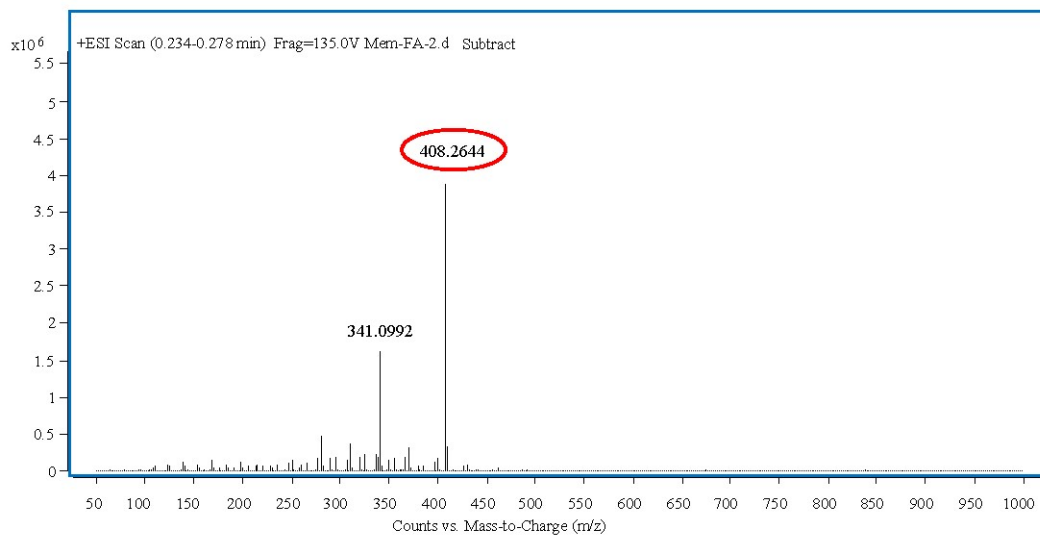

**Fig. S4** HRMS data of the reaction products of probe **Mem-FA** with FA.
